# Supplementary material for: Single Point Mutation from E22-to-K in Aβ Initiates Early-Onset Alzheimer’s Disease by Binding with Catalase
Source: Hindawi journal article supplement (doi:10.1155/2020/4981204), 2020-12-24
Supplement: f1 [file 4981204.f1.pdf]

# Supplementary Figure 1

|                    |            |            |                    |              |    |    |
|--------------------|------------|------------|--------------------|--------------|----|----|
|                    | 1          | 10         | 20                 | 30           | 40 | 42 |
| <b>A</b>           |            |            |                    | ▼            |    |    |
| Aβ1-42 (wild-type) | DAEFRHDSGY | EVHHQKLVFF | <b>A</b> EDVGSNKGA | IIGLMVGGVVIA | IA | IA |
| E22K (Italian)     | DAEFRHDSGY | EVHHQKLVFF | <b>A</b> KDVGSNKGA | IIGLMVGGVVIA | IA | IA |

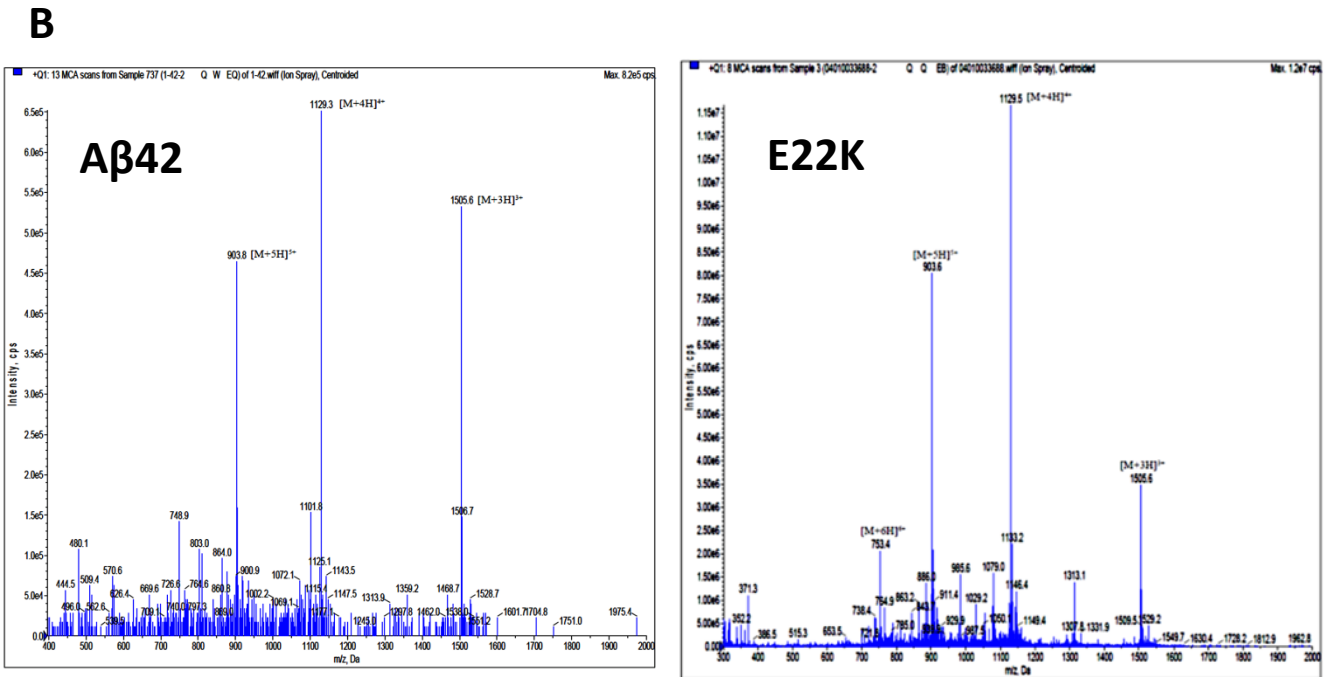

**Figure S1.** The synthetic wild-type Aβ and E22K mutant identified by liquid chromatography-tandem mass spectrometry (LC-MS/MS).

## Supplementary Figure 2

### A. PBS-incubation

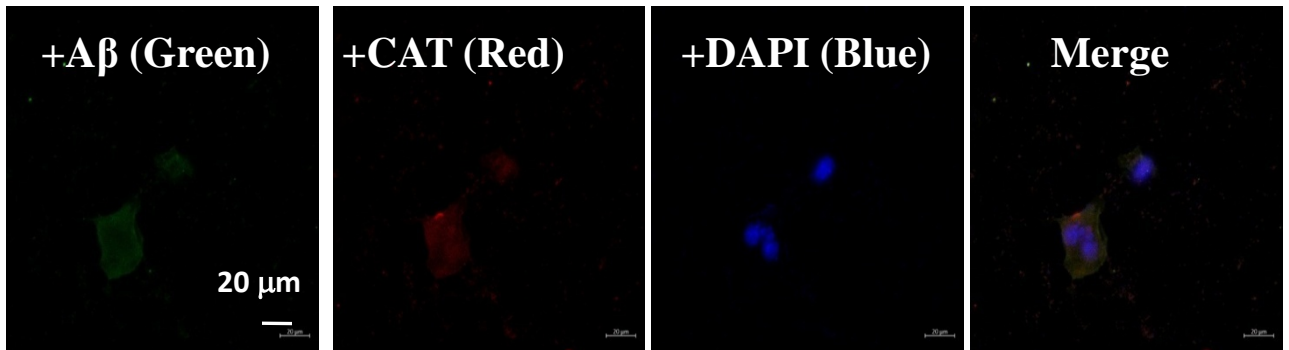

### B. A $\beta$ 42-incubation

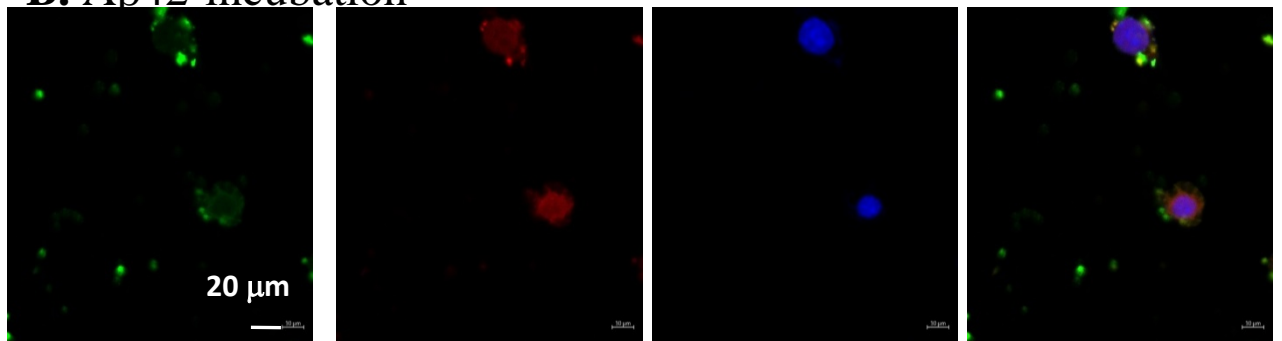

### C. E22K-incubation

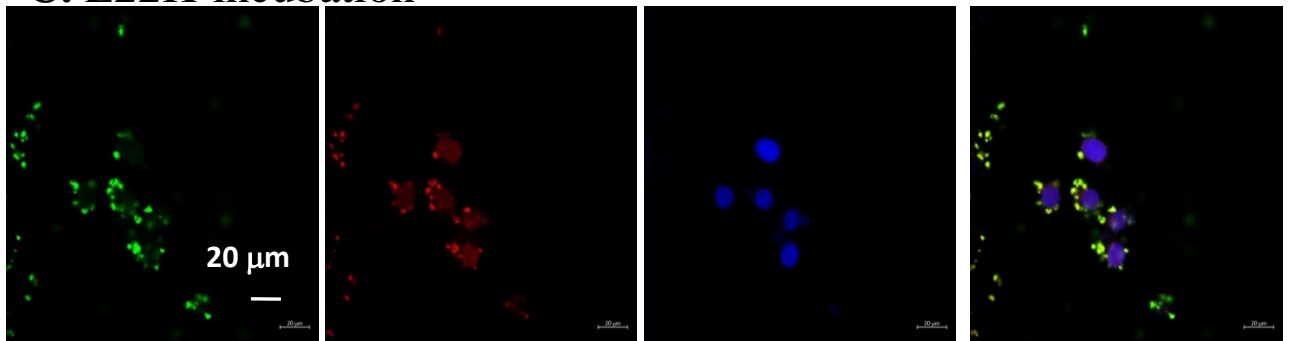

**Fig. S2.** The localization of A $\beta$  with catalase (CAT) in the cultured human SY5Y cells (H-SY5Y) after PBS, A $\beta$ 42, or E22K incubation 6 hours.

## Supplementary Figure 3

### A. PBS-injection

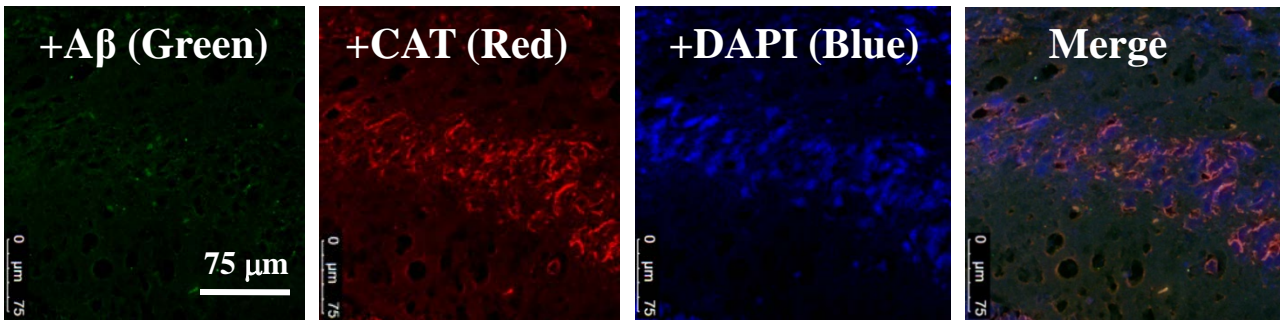

### B. A $\beta$ 42-injection

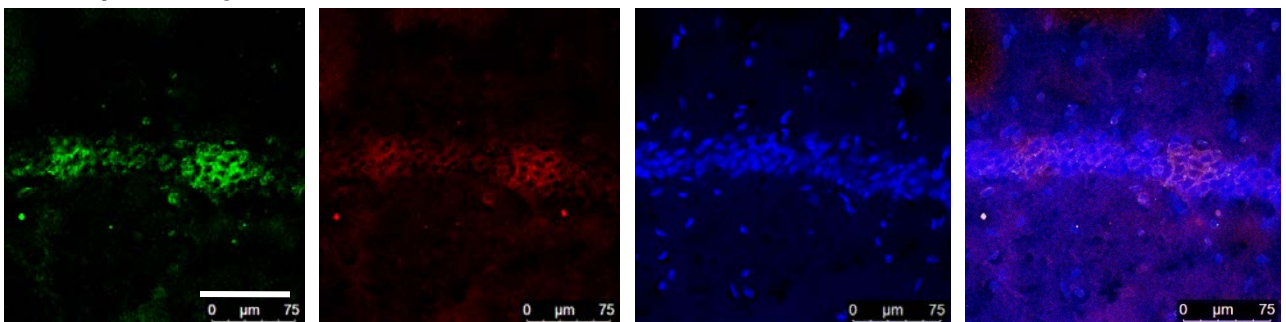

### C. E22K-injection

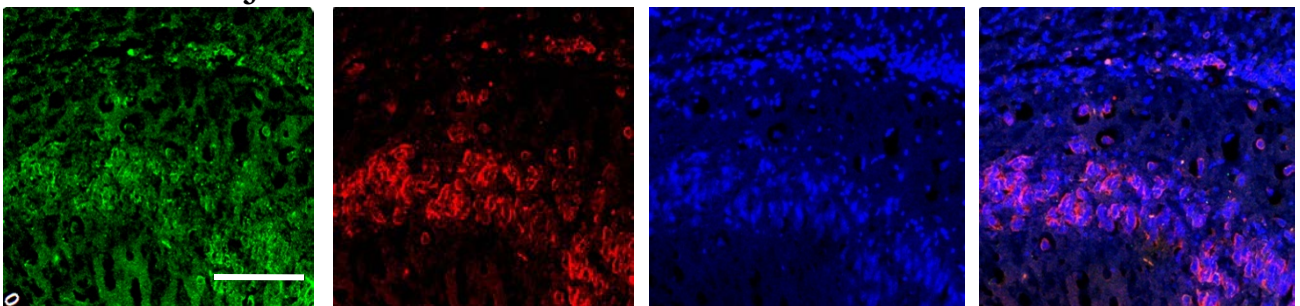

**Fig. S3.** The localization of A $\beta$  with catalase(CAT) in the hippocampus of these SD rats injected with PBS, A $\beta$ , or E22K on day 30.

## Supplementary Figure 4

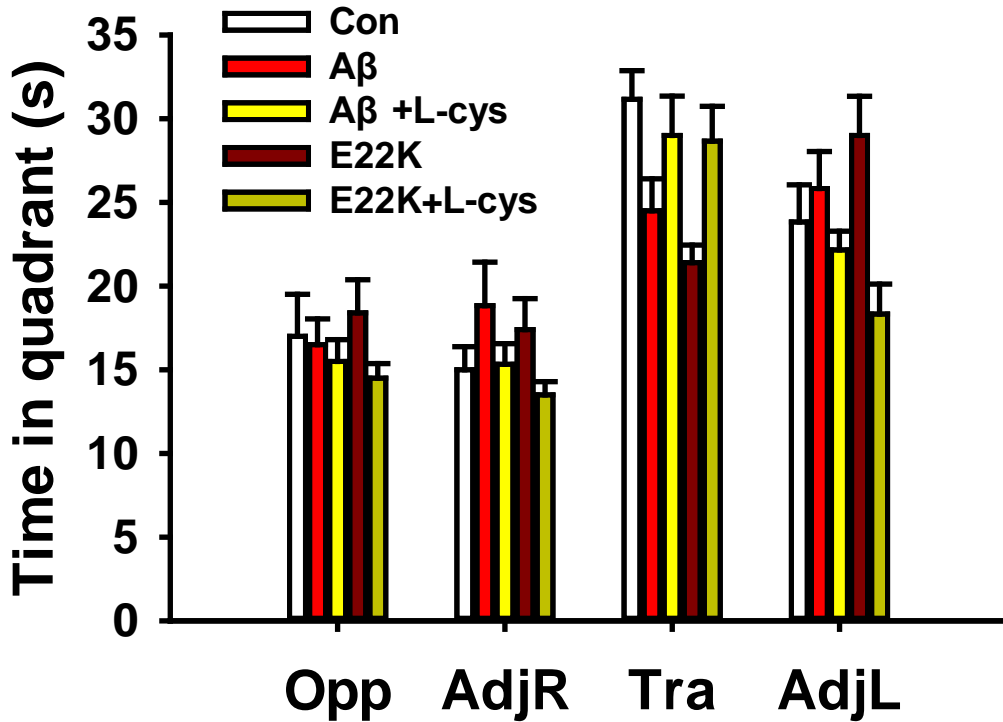

**Fig. S4.** Time in different quadrants of the five groups of mice in the Morris water maze on day 7. The adjacent left (AdjL), training (Tra), adjacent right (AdjR), and opposite (Opp) quadrants.

## Supplementary Figure 5

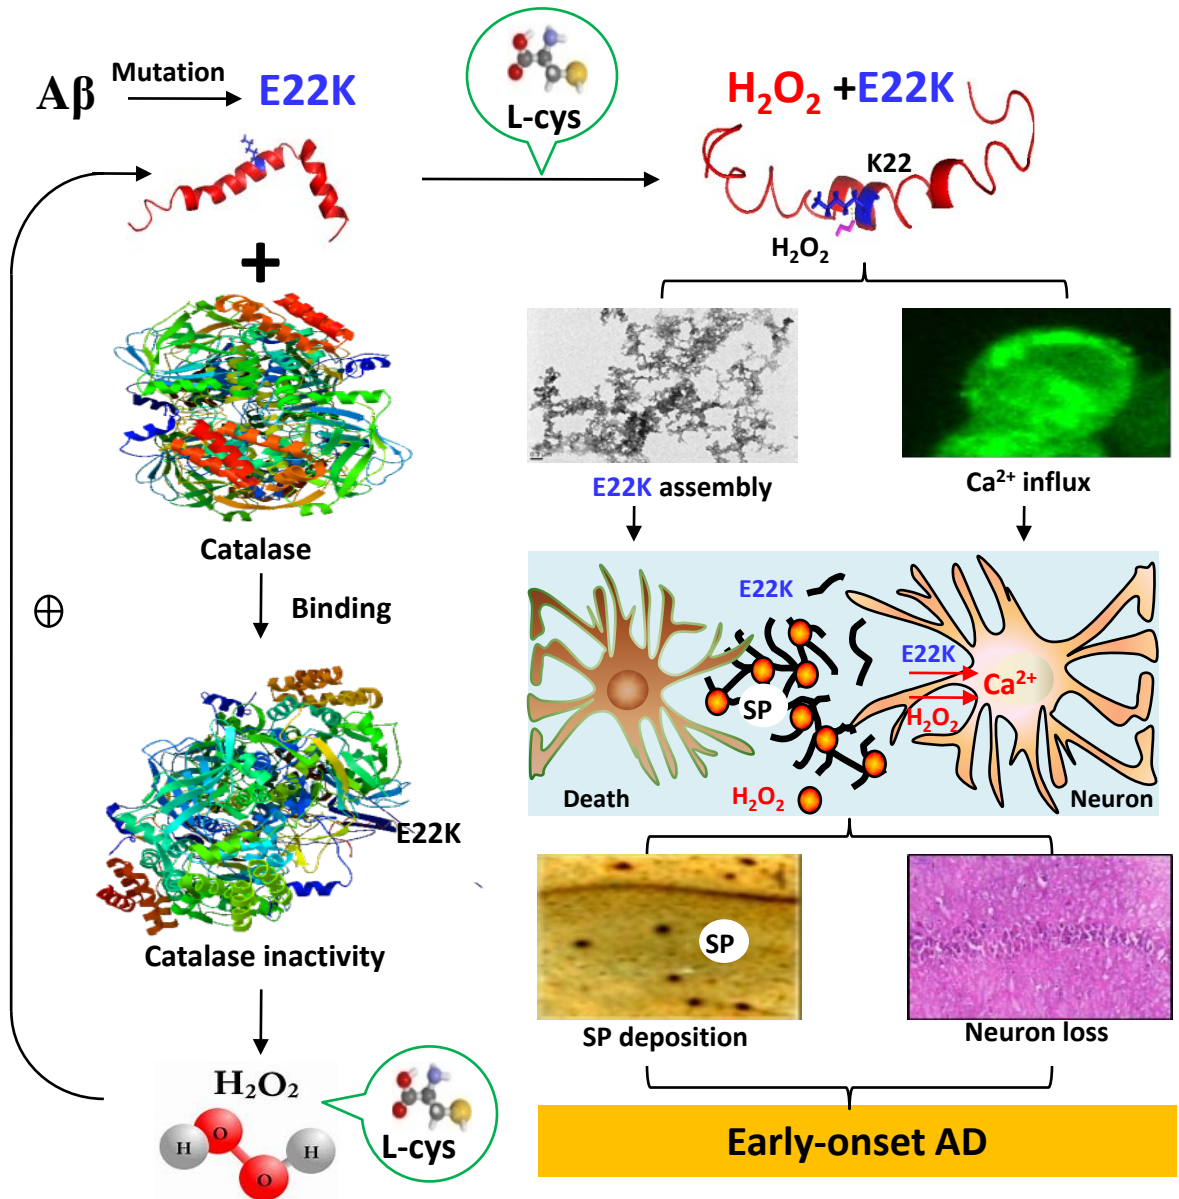

**Fig. S5. The model of early-onset Italian familial Alzheimer's disease.** Briefly, E22K induces higher levels of H<sub>2</sub>O<sub>2</sub> generation by rapidly inhibiting catalase activity than Aβ. Excessive H<sub>2</sub>O<sub>2</sub> elicits severe E22K assemblies and neuron loss, and then results in the early-onset AD. However, L-cysteine (L-cys) rescues memory functions. AD: Alzheimer's disease, SP: senile plaques.
